# Supplementary material
Source: publisher site journal article supplement (https://www.spandidos-publications.com/6840/downloadSupplementary)
Supplement: Supplementary file 1 [file downloadSupplementary]

Table SI. Primer sequences.

| Gene name                       | Accession    | Product length | Primer sequence (5'-3')                                 |
|---------------------------------|--------------|----------------|---------------------------------------------------------|
| <i>Trp63</i>                    | NM_001427037 | 117            | F: TACTGCCCCGACCCTTACAT<br>R: GCTGAGGAACTCGCTTGTCTG     |
| <i>Trp73</i>                    | NM_001126330 | 75             | F: TCTTTCGAGGGTCGCATCTG<br>R: CTGTTGCTCCCGGTAATGGT      |
| <i>Dapk1</i>                    | NM_029653    | 107            | F: ATGACTGTGTTTCAGGCAGGAA<br>R: CCGGTACTTTTCTCACGACATTT |
| <i>Casp14</i>                   | NM_009809    | 152            | F: ACGCATGTTCCGTTACCTGAA<br>R: CACCATGTGCCATGAGTACCA    |
| <i>Cd70</i>                     | NM_011617    | 89             | F: GCTGAATCTCACAGTTCCTCGG<br>R: GCTCTGGTCCGTGTGTGAA     |
| <i><math>\beta</math>-actin</i> | NM_007393    | 245            | F:GTGACGTTGACATCCGTAAAGA<br>R:GCCGGACTCATCGTACTCC       |

F, forward; R, reverse.

Table SII. Screening results for differential metabolites in the model and treatment groups.

| No. | name                               | mz      | RT      | FC    | P-value                | VIP   | Type |
|-----|------------------------------------|---------|---------|-------|------------------------|-------|------|
| 1   | Geranyl diphosphate                | 314.091 | 314.800 | 0.590 | 2.162x10 <sup>-7</sup> | 2.812 | down |
| 2   | 3-Indoleacetonitrile               | 156.121 | 708.000 | 1.600 | 3.998x10 <sup>-7</sup> | 2.802 | up   |
| 3   | D-Arabitol                         | 152.995 | 961.200 | 0.390 | 1.179x10 <sup>-4</sup> | 2.578 | down |
| 4   | D-Lyxose                           | 151.036 | 924.200 | 0.730 | 3.818x10 <sup>-4</sup> | 2.487 | down |
| 5   | cis-Aconitate                      | 173.007 | 77.400  | 0.120 | 5.549x10 <sup>-7</sup> | 2.419 | down |
| 6   | Enalaprilat                        | 349.184 | 918.800 | 1.440 | 5.815x10 <sup>-3</sup> | 2.155 | up   |
| 7   | (R) 2,3-Dihydroxy-3-methylvalerate | 148.089 | 98.000  | 1.340 | 6.195x10 <sup>-3</sup> | 2.140 | up   |
| 8   | Sorbitol                           | 183.081 | 941.700 | 2.200 | 6.375x10 <sup>-3</sup> | 2.135 | up   |
| 9   | 4-Pyridoxic acid                   | 182.044 | 282.000 | 1.580 | 1.497x10 <sup>-3</sup> | 2.018 | up   |
| 10  | 4-Fumarylacetoacetate              | 201.053 | 117.300 | 1.160 | 1.731x10 <sup>-2</sup> | 1.946 | up   |
| 11  | Pimelic acid                       | 159.969 | 33.300  | 1.820 | 1.738x10 <sup>-2</sup> | 1.939 | up   |
| 12  | 6-Phosphogluconic acid             | 276.898 | 33.100  | 0.390 | 2.143x10 <sup>-2</sup> | 1.901 | down |
| 13  | Isocitric acid                     | 192.033 | 122.500 | 0.340 | 2.138x10 <sup>-2</sup> | 1.894 | down |
| 14  | Oleamide                           | 282.279 | 872.600 | 1.040 | 2.270x10 <sup>-2</sup> | 1.879 | up   |
| 15  | 3-Hydroxymethylglutaric acid       | 145.050 | 59.500  | 0.400 | 2.476x10 <sup>-2</sup> | 1.866 | down |
| 16  | Thiamine                           | 265.112 | 96.300  | 0.180 | 2.760x10 <sup>-2</sup> | 1.834 | down |
| 17  | Ciliatine                          | 125.987 | 614.700 | 0.590 | 2.866x10 <sup>-2</sup> | 1.821 | down |
| 18  | D-Galactose                        | 179.055 | 95.200  | 0.530 | 9.531x10 <sup>-3</sup> | 1.814 | down |
| 19  | L-Glutamic gamma-semialdehyde      | 131.049 | 282.500 | 0.860 | 3.171x10 <sup>-2</sup> | 1.802 | down |
| 20  | Yohimbine                          | 353.197 | 729.800 | 5.170 | 1.109x10 <sup>-2</sup> | 1.797 | up   |
| 21  | Linoleic acid                      | 280.264 | 868.500 | 1.180 | 3.544x10 <sup>-2</sup> | 1.770 | up   |
| 22  | Geranyl acetate                    | 179.144 | 629.100 | 0.500 | 3.748x10 <sup>-2</sup> | 1.750 | down |
| 23  | Alpha-D-Glucose                    | 179.055 | 932.000 | 0.410 | 1.419x10 <sup>-2</sup> | 1.749 | down |
| 24  | Phosphoglycolic acid               | 155.992 | 941.700 | 0.930 | 4.276x10 <sup>-2</sup> | 1.718 | down |
| 25  | Adipic acid                        | 145.049 | 157.000 | 0.820 | 1.554x10 <sup>-2</sup> | 1.712 | down |
| 26  | Guanosine                          | 284.099 | 243.000 | 0.200 | 4.534x10 <sup>-2</sup> | 1.702 | down |
| 27  | Dihydrouracil                      | 112.984 | 864.200 | 1.400 | 2.752x10 <sup>-2</sup> | 1.596 | up   |
| 28  | Bovinic acid                       | 279.231 | 801.500 | 0.500 | 2.571x10 <sup>-2</sup> | 1.584 | down |
| 29  | Procollagen 5-hydroxy-L-lysine     | 197.806 | 162.200 | 0.230 | 3.209x10 <sup>-2</sup> | 1.546 | down |
| 30  | Suberic acid                       | 155.019 | 920.600 | 0.480 | 4.565x10 <sup>-2</sup> | 1.451 | down |
| 31  | cis-4-Hydroxy-D-proline            | 129.974 | 104.500 | 1.300 | 4.848x10 <sup>-2</sup> | 1.433 | up   |

Table SIII. PCR array.

| gene name | T/M          | Difference |
|-----------|--------------|------------|
| Trp63     | 0.187752675  | *          |
| Trp73     | 0.2150048954 | *          |
| Dapk1     | 0.3133011837 | *          |
| Casp14    | 0.4022473555 | *          |
| Cd70      | 0.4955325077 | *          |
| Cd40      | 1.181870848  | ns         |
| Il10      | 0.998612237  | ns         |
| Tnf       | 0.881020123  | ns         |
| Bcl2l10   | 1.117290829  | ns         |
| Sphk2     | 0.679885778  | ns         |
| Xiap      | 0.875304524  | ns         |
| Pycard    | 0.788742445  | ns         |
| Birc6     | 1.067075788  | ns         |
| Card10    | 1.274311579  | ns         |
| Igflr     | 1.386341664  | ns         |
| Traf3     | 0.903018979  | ns         |
| Traf2     | 1.382731895  | ns         |
| Abl1      | -            | ns         |
| Bak1      | 1.032108674  | ns         |
| Ltbr      | 0.716017557  | ns         |
| Atf5      | 1.111356955  | ns         |
| Nol3      | 0.823691364  | ns         |
| Bad       | 0.979010349  | ns         |
| Cflar     | 0.525788744  | ns         |
| Nfkb1     | 0.892748955  | ns         |
| Bag3      | 0.78024944   | ns         |
| Bcl2l11   | 0.135771845  | ns         |
| Bcl2l1    | 1.14527429   | ns         |
| Fadd      | 0.926871547  | ns         |
| Trp53bp2  | 0.743164852  | ns         |
| Gadd45a   | 0.874989772  | ns         |
| Birc5     | 1.246268869  | ns         |
| Ripk1     | 1.246653863  | ns         |
| Cradd     | 0.813154552  | ns         |
| Mcl1      | 1.020125412  | ns         |
| Bcl2l2    | 0.86570254   | ns         |
| Dffb      | 1.259704024  | ns         |
| Trp53     | 1.00439208   | ns         |
| Tnfsf12   | 0.925775398  | ns         |
| Nod1      | 1.05936001   | ns         |
| Mapk1     | 0.561192749  | ns         |
| Tnfrsf10b | 1.152806412  | ns         |
| Tnfrsf12a | 0.922007145  | ns         |
| Dffa      | 0.883621217  | ns         |
| Diablo    | 0.313301184  | ns         |
| Tnfrsf1a  | 0.141215475  | ns         |
| Akt1      | -            | ns         |

|           |             |    |
|-----------|-------------|----|
| Casp3     | 1.305612148 | ns |
| Tnfrsf11b | 0.58574912  | ns |
| Bok       | 1.119844112 | ns |
| Apaf1     | 1.103461566 | ns |
| Bag4      | 0.80174673  | ns |
| Bag4      | 0.846625071 | ns |
| Casp9     | 1.025638383 | ns |
| Fasl      | 0.92878672  | ns |
| Bnip3l    | 0.687756763 | ns |
| Traf1     | 0.930021245 | ns |
| Lhx4      | 0.878024027 | ns |
| Casp6     | 1.090242167 | ns |
| Casp1     | 1.000512851 | ns |
| Bag1      | 1.166084412 | ns |
| Prdx2     | 0.90874121  | ns |
| Naip2     | 0.913870163 | ns |
| Birc2     | 0.859311202 | ns |
| Casp2     | 1.029342431 | ns |
| Cideb     | 0.405960359 | ns |
| Aifm1     | -           | ns |
| Anxa5     | 0.766663161 | ns |
| Bcl2      | 0.766916616 | ns |
| Bnip2     | 1.264080219 | ns |
| Casp8     | 1.267887165 | ns |
| Bcl10     | 0.990175648 | ns |
| Ripk2     | 1.054441704 | ns |
| Api5      | 0.937505217 | ns |
| Casp7     | 0.944864269 | ns |
| Nme5      | -           | ns |
| Bid       | 0.61068753  | ns |
| Polb      | 1.187755415 | ns |
| Dad1      | -           | ns |
| Birc3     | 0.897620869 | ns |
| Casp4     | 0.391528299 | ns |
| Bnip3     | 0.879410168 | ns |
| Casp12    | 0.978774103 | ns |
| Tnfsf10   | 0.958896511 | ns |
| Fas       | 0.897888405 | ns |
| Cidea     | 0.126807251 | ns |
| Naip1     | 0.778434787 | ns |

---

ns, not significant.
